# Supplementary material for: Characterising variation in composition and activation criteria of rapid response and cardiac arrest teams: a survey of Medicare participating hospitals in five American states
Source: PubMed Central journal article supplement — BMJ Open. 2019 Mar 8;9(3):e024548. doi: 10.1136/bmjopen-2018-024548 (PMC6429839; doi:10.1136/bmjopen-2018-024548), 2019-03-08
Supplement: bmjopen-2018-024548supp001.pdf [file bmjopen-2018-024548supp001.pdf]

1. Hospital affiliation (select one):  
University affiliated  
Non-university affiliated
2. State:
3. Financial structure (select one)  
Private  
Public  
Veteran's Affairs
4. Number of inpatient beds  
0-100  
100-500  
>500
5. Number of ICU beds in your hospital  
0  
1-20  
21-50  
>50
6. ACGME Internal Medicine Residency Program Yes/No
7. ACGME Critical Care Fellowship Program Yes/No
8. ACGME Anaesthesiology Residency Program Yes/No
9. Does your hospital have a rapid response team (RRT)? Yes/No
10. Is your RRT available 24 hours a day? Yes/No
11. How are RRTs called at your hospital?  
Pager  
Overhead call  
Phone  
Other
12. If other, how are RRTs called at your hospital?

13. Who is usually responsible for leading RRTs? NP/PA  
Internal medicine resident  
Internal medicine attending  
Critical care fellow  
Critical care attending  
Critical care nursing  
Anaesthesia resident  
Anaesthesia attending  
Other

14. If other, who is usually responsible for leading RRTs at your hospital?

15. What parameters can result in a RRT being called? Early warning score (NEWS, MEWS etc)  
Single vital sign abnormality (eg HR, RR etc)  
Clinical concern  
Other

16. If other, what parameters can results in an RRT being called at your hospital?

17. Members of the RRT usually change: Daily  
Weekly  
Monthly  
Rarely

18-29. Who is present at RRT's? Always, Sometimes, Never

Nurse Practitioner  
Physician Assistant  
Internal Medicine Resident  
Internal Medicine Attending  
Anaesthesia Resident  
Anaesthesia Attending

Critical Care Fellow  
Critical Care Attending  
Critical Care Nurse  
Nurse Manager  
Respiratory Therapist  
Pharmacist

30. Does your hospital have a cardiac arrest team?

31. How are cardiac arrests called at your hospital?      Pager  
Overhead call  
Phone  
Other

32. If other, how are cardiac arrests called at your hospital?

33. Who is usually responsible for leading cardiac arrests? NP/PA  
Internal medicine resident  
Internal medicine attending  
Critical care fellow  
Critical care attending  
Critical care nursing  
Anaesthesia resident  
Anaesthesia attending  
Other

34. If other, who is responsible for leading cardiac arrests at your hospital?

35-46. Who is present at cardiac arrests?      Always, Sometimes, Never

Nurse Practitioner  
Physician Assistant  
Internal Medicine Resident  
Internal Medicine Attending

Anaesthesia Resident  
Anaesthesia Attending  
Critical Care Fellow  
Critical Care Attending  
Critical Care Nurse  
Nurse Manager  
Respiratory Therapist  
Pharmacist
